# Supplementary material for: Antibodies to SARS-CoV-2 in follicular fluids and their association with assisted reproduction
Source: PubMed Central journal article supplement (PMC10064043; doi:10.3389/fimmu.2023.1120328), 2023-03-17
Supplement: DataSheet_1.pdf [file DataSheet_1.pdf]

*Supplementary Material SARS-CoV-2 antibodies in assisted reproduction*

*Supplementary Figures and Tables*

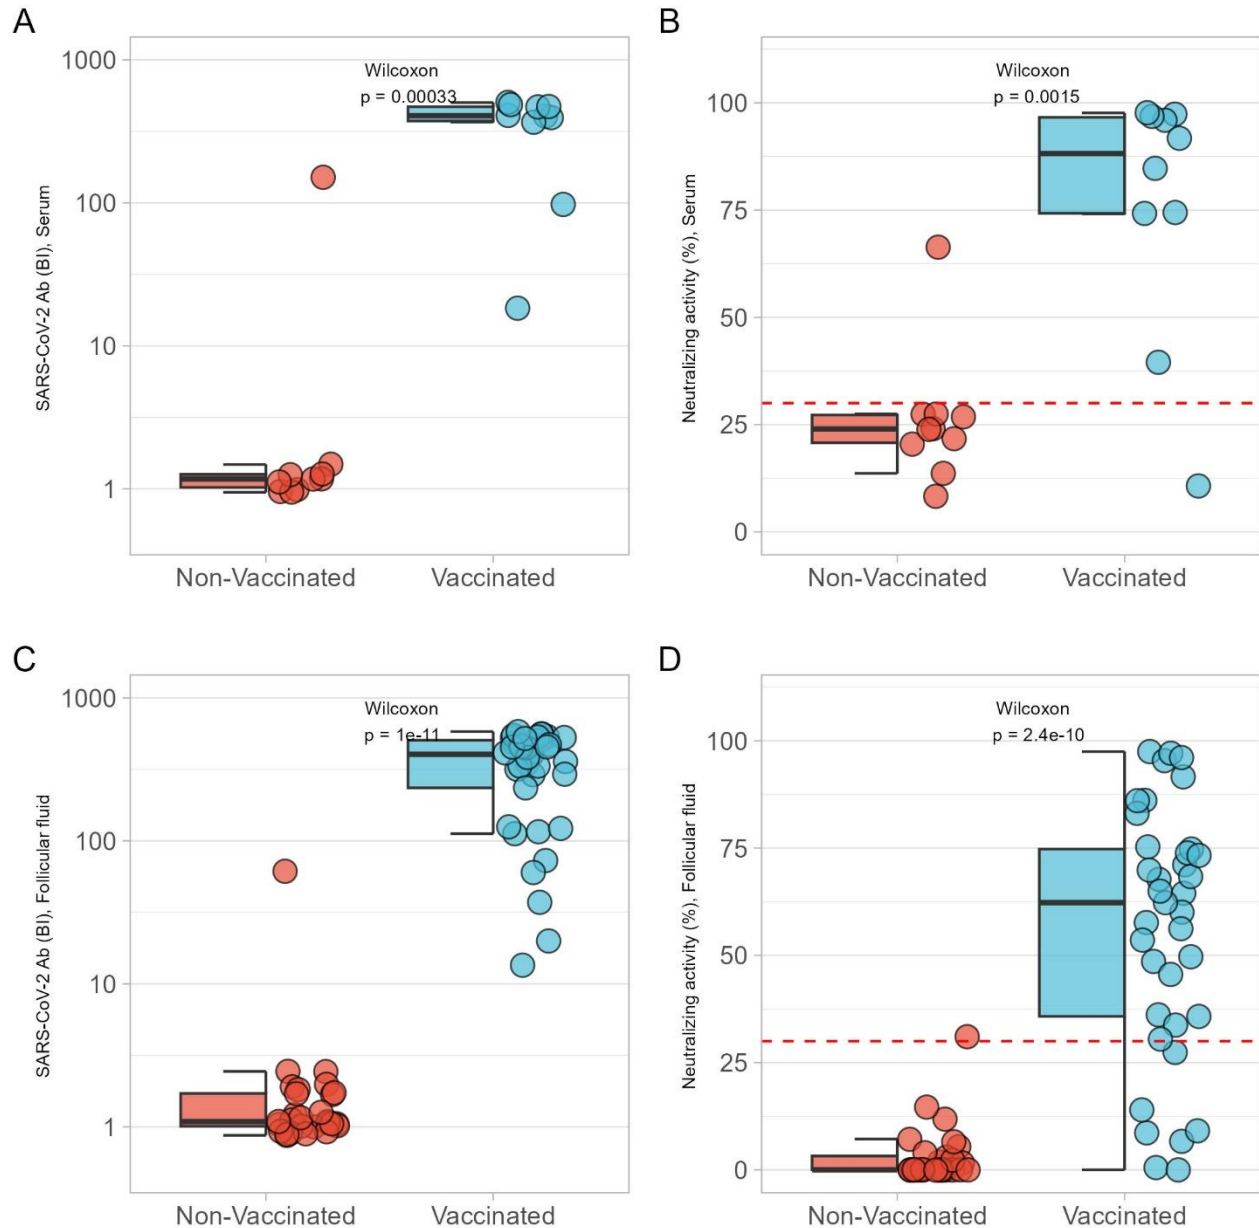

**Supplementary Figure 1. Pairwise comparisons of vaccinated and non-vaccinated subjects. A** Comparison of serum SARS-CoV-2 antibody titers. **B** Comparison of neutralizing activity of serum samples. **C** Comparison of SARS-CoV-2 antibody titers in follicular fluids. **D** Comparison of neutralizing activity in follicular fluids. Pairwise comparisons were conducted applying Wilcoxon rank sum test. Serum: n= 10; Follicular fluid: Non-Vaccinated: n= 28, Vaccinated: n= 37.

**Supplementary Material Free zinc and  
COVID-19 vaccination**

**Supplementary Table 1. Trace element status in follicular fluids of patients with ten individual samples**

| Variable                                 | Vaccinated           |                      |                      | Non-vaccinated       |                      |
|------------------------------------------|----------------------|----------------------|----------------------|----------------------|----------------------|
|                                          | Patient 1,<br>n = 10 | Patient 2,<br>n = 10 | Patient 3,<br>n = 10 | Patient 4,<br>n = 10 | Patient 5,<br>n = 10 |
| <b>Selenium (µg/L), Follicular fluid</b> |                      |                      |                      |                      |                      |
| Median (IQR)                             | 9.8 (9.2)            | 26.4 (13.3)          | 22.6 (17.5)          | 33.8 (21.0)          | 23.4 (18.6)          |
| Range                                    | 2.6, 42.7            | 3.2, 45.4            | 0.0, 42.4            | 11.3, 53.7           | 7.7, 38.7            |
| <b>Zinc (µg/L), Follicular fluid</b>     |                      |                      |                      |                      |                      |
| Median (IQR)                             | 158.5 (93.0)         | 391.0 (148.6)        | 306.8 (172.6)        | 204.8 (105.0)        | 325.8 (212.1)        |
| Range                                    | 56.2, 463.2          | 103.9, 580.4         | 80.5, 480.4          | 105.5, 337.6         | 122.7, 463.0         |
| <b>Copper (µg/L), Follicular fluid</b>   |                      |                      |                      |                      |                      |
| Median (IQR)                             | 351.7 (106.9)        | 651.6 (290.1)        | 455.6 (280.7)        | 325.8 (209.4)        | 815.6 (534.7)        |
| Range                                    | 100.2, 790.4         | 207.2, 1,004.0       | 104.3, 764.8         | 142.3, 499.2         | 306.6, 1,140.0       |
| <b>Iron (µg/L), Follicular fluid</b>     |                      |                      |                      |                      |                      |
| Median (IQR)                             | 215.7 (126.4)        | 471.0 (189.4)        | 412.1 (264.9)        | 157.6 (35.3)         | 416.0 (271.9)        |
| Range                                    | 73.3, 624.8          | 112.5, 716.0         | 106.9, 665.6         | 118.6, 269.4         | 160.3, 643.8         |

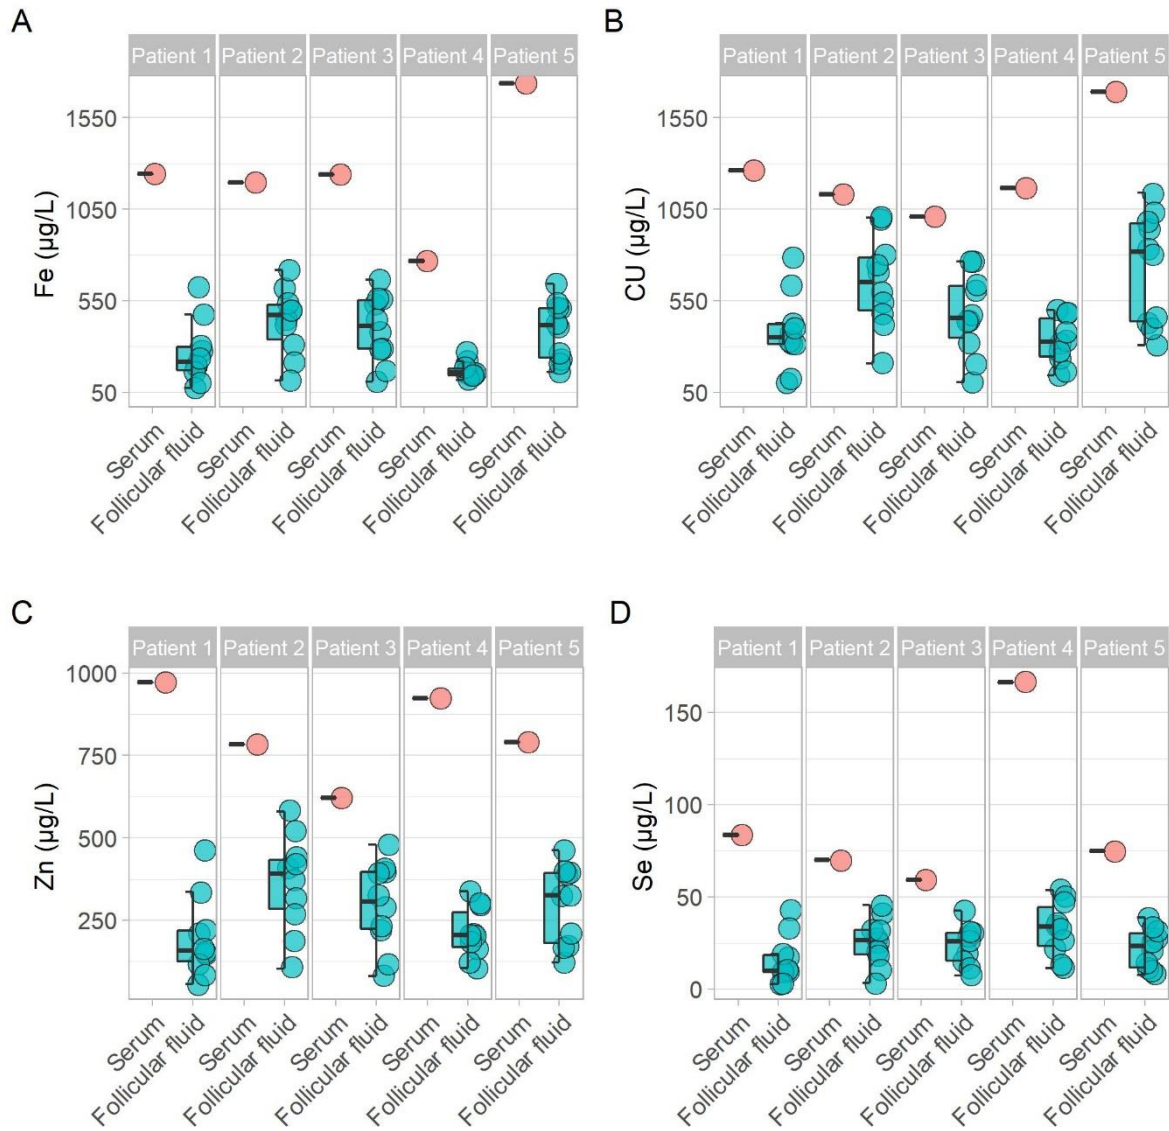

**Supplementary Figure 2.** Trace element (Iron, Copper, Zinc, Selenium) titers of serum and follicular fluid is shown next to each other for each participant individually.
